# Supplementary material for: Preparation and reactivity of penta- and tetracoordinate platinum(ii) hydride complexes with P(OEt)3 and PPh(OEt)2 phosphite ligands
Source: Royal Society of Chemistry journal article supplement (doi:10.1039/b505453b), 2005-01-01
Supplement: b505453b.pdf [file b505453b.pdf]

**Preparation and reactivity of penta- and tetracoordinate platinum(II) hydride complexes with P(OEt)<sub>3</sub> and PPh(OEt)<sub>2</sub> phosphite ligands**

**Gabriele Albertin, Stefano Antoniutti, Christian Busato, Jesús Castro, and Soledad García-Fontán**

Table S1. Hydrogen bonds parameters

| D-H...A                          | d(D-H) | d(H...A) | d(D...A) | <(DHA) |
|----------------------------------|--------|----------|----------|--------|
| C(12)-H(12B)...F(1) <sup>1</sup> | 0.98   | 2.15     | 2.90(4)  | 132.4  |
| C(21)-H(21A)...F(2) <sup>2</sup> | 0.99   | 2.36     | 2.93(4)  | 116.1  |

Symmetry transformations used to generate equivalent atoms:

<sup>1</sup>  $x-1/2, y-1/2, z-1/2$

<sup>2</sup>  $x, y, -z+1$

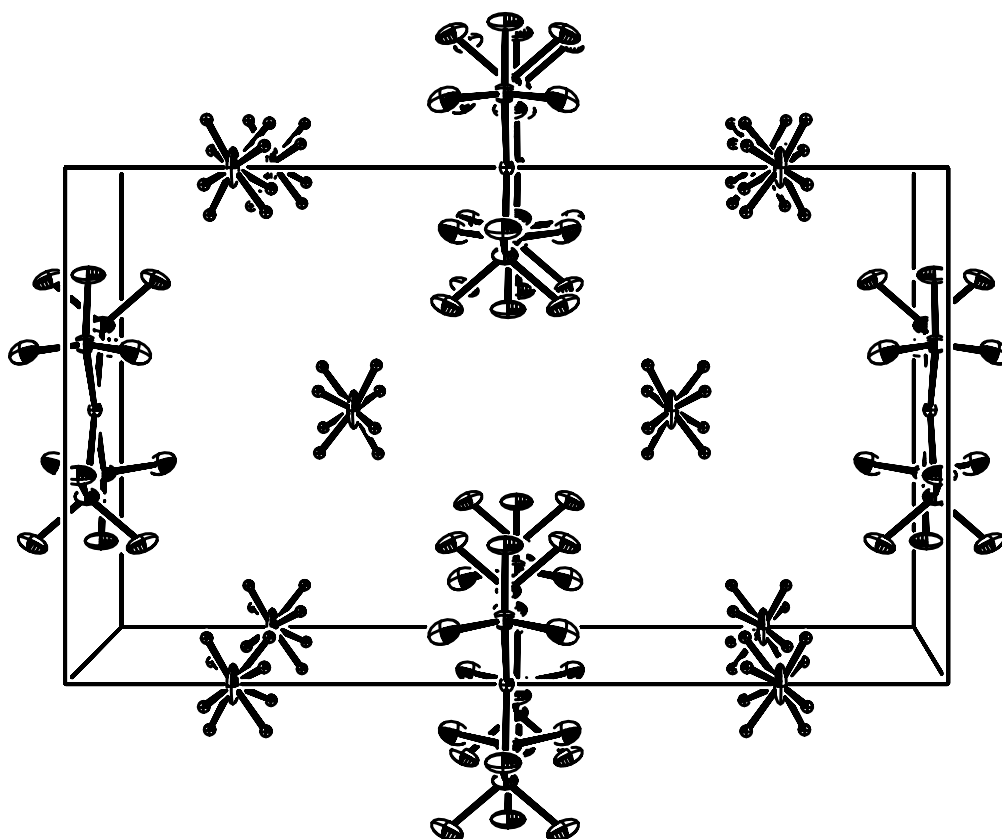

Figure S1. Packing of the molecules in the cell. The carbon atoms were omitted.
